# Supplementary material
Source: Springer Nature journal article supplement (https://www.springermedizin.de/resource/supplementary/12885_2013_4097_MOESM4_ESM.pdf/9465330)

**GAPDH**

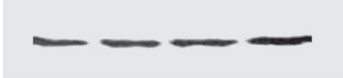

**MAP2K3**

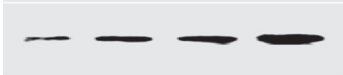

**Ad/pri-miR-21**

**+**

**-**

**-**

**-**

**Ad/con**

**-**

**-**

**+**

**-**

**Ad/miR-21/inhibitor**

**-**

**-**

**-**

**+**

Supplement: MOESM4 [file 9465330]
